# Supplementary material
Source: ML conference proceedings conference paper supplement (https://openaccess.thecvf.com/content/WACV2021/html/Shen_Real-Time_Uncertainty_Estimation_WACV_2021_paper.html)
Supplement: Supplementary file 1 [file Shen_Real-Time_Uncertainty_Estimation_WACV_2021_supplemental.pdf]

## 6. Appendix

| CamVid      |              |              |                          |                           |
|-------------|--------------|--------------|--------------------------|---------------------------|
|             | ACC          | IOU          | ECE ( $\times 10^{-3}$ ) | AUSE ( $\times 10^{-2}$ ) |
| Best Single | 0.900        | 0.641        | 8.27                     | 4.46                      |
| Teacher     | 0.904        | 0.650        | 5.42                     | 3.02                      |
| Student     | <b>0.909</b> | <b>0.653</b> | <b>2.96</b>              | <b>1.91</b>               |

  

| NYU         |              |              |                          |                           |
|-------------|--------------|--------------|--------------------------|---------------------------|
|             | RMSE         | REL          | ECE ( $\times 10^{-3}$ ) | AUSE ( $\times 10^{-2}$ ) |
| Best Single | 0.543        | 0.149        | 70.8                     | 6.11                      |
| Teacher     | <b>0.510</b> | <b>0.140</b> | 56.4                     | <b>5.58</b>               |
| Student     | 0.530        | 0.144        | <b>56.3</b>              | 5.93                      |

Table 4: Performance of teacher and student model when a Deep Ensemble is used as the teacher. “Best Single” represents the best NN among all in the ensemble in terms of IOU/RMSE. For “Best Single”, only the aleatoric uncertainty is used to compute uncertainty metrics.

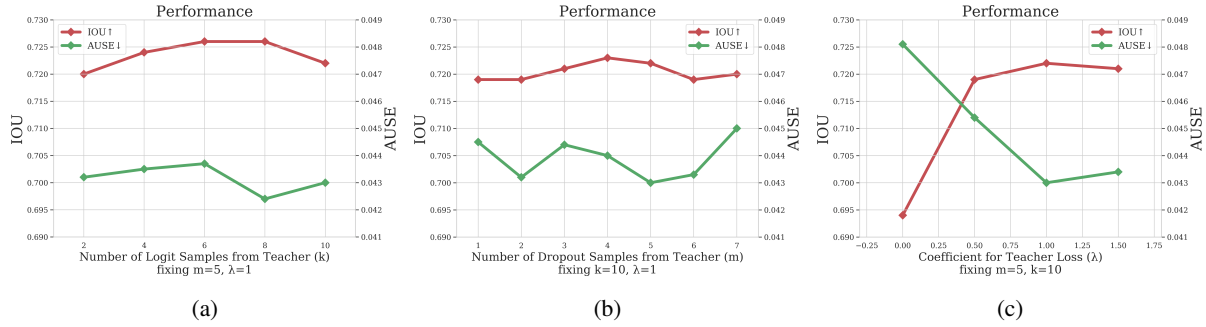

Figure 9: Ablation study conducted using VOC2012 dataset. (a-b) Performance of the student model when the number of samples from the teacher model are varied at each mini-batch. As seen in the plots, the performance is generally insensitive to the choice of sample size. Using larger number of samples only brings slight improvement in performance up to a point. (c) Performance of student model against  $\lambda$ , the weight put on the teacher loss (See Eqn. 11). As seen clearly, introducing the teacher loss improves the performance of the student and the student performs the best when  $\lambda = 1$ .

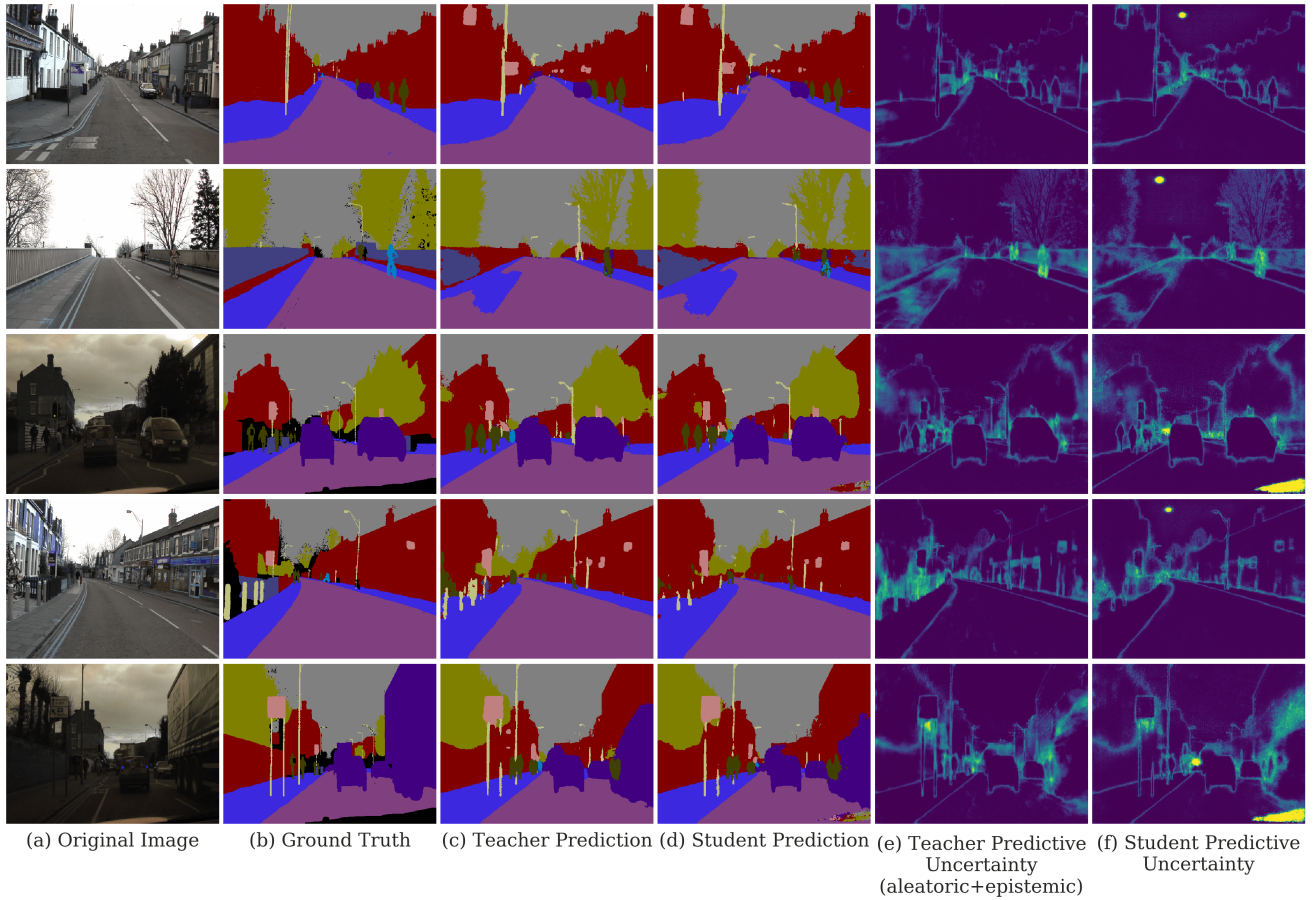

Figure 10: Additional example predictions on CamVid.

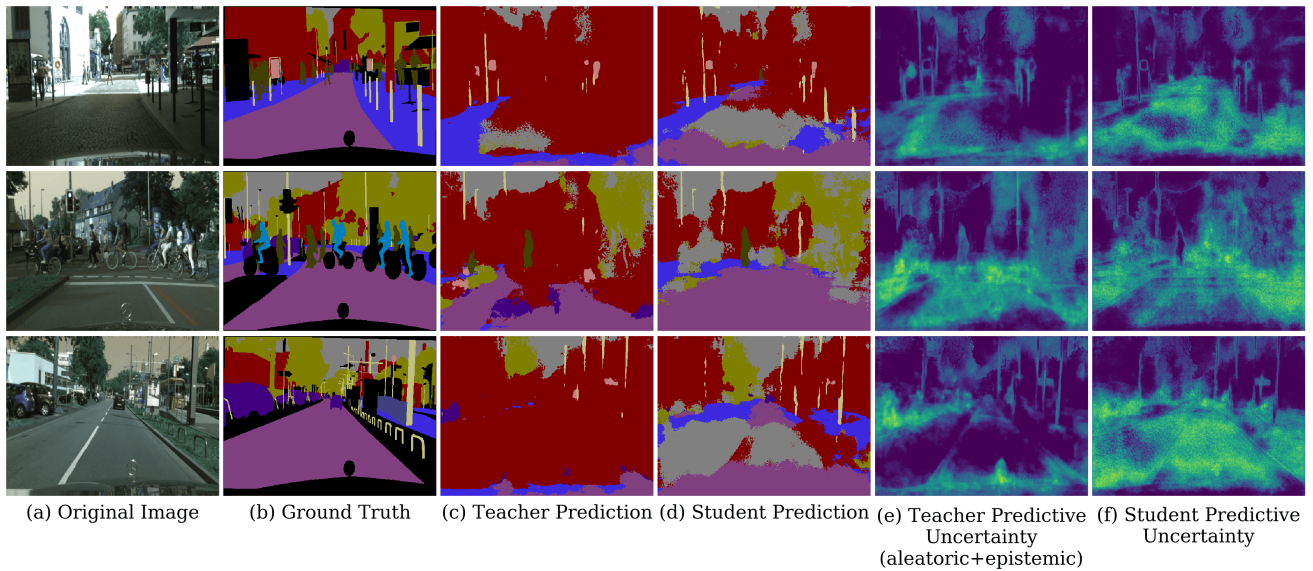

Figure 11: Example predictions on the Cityscapes dataset under distribution shift using models trained with CamVid.

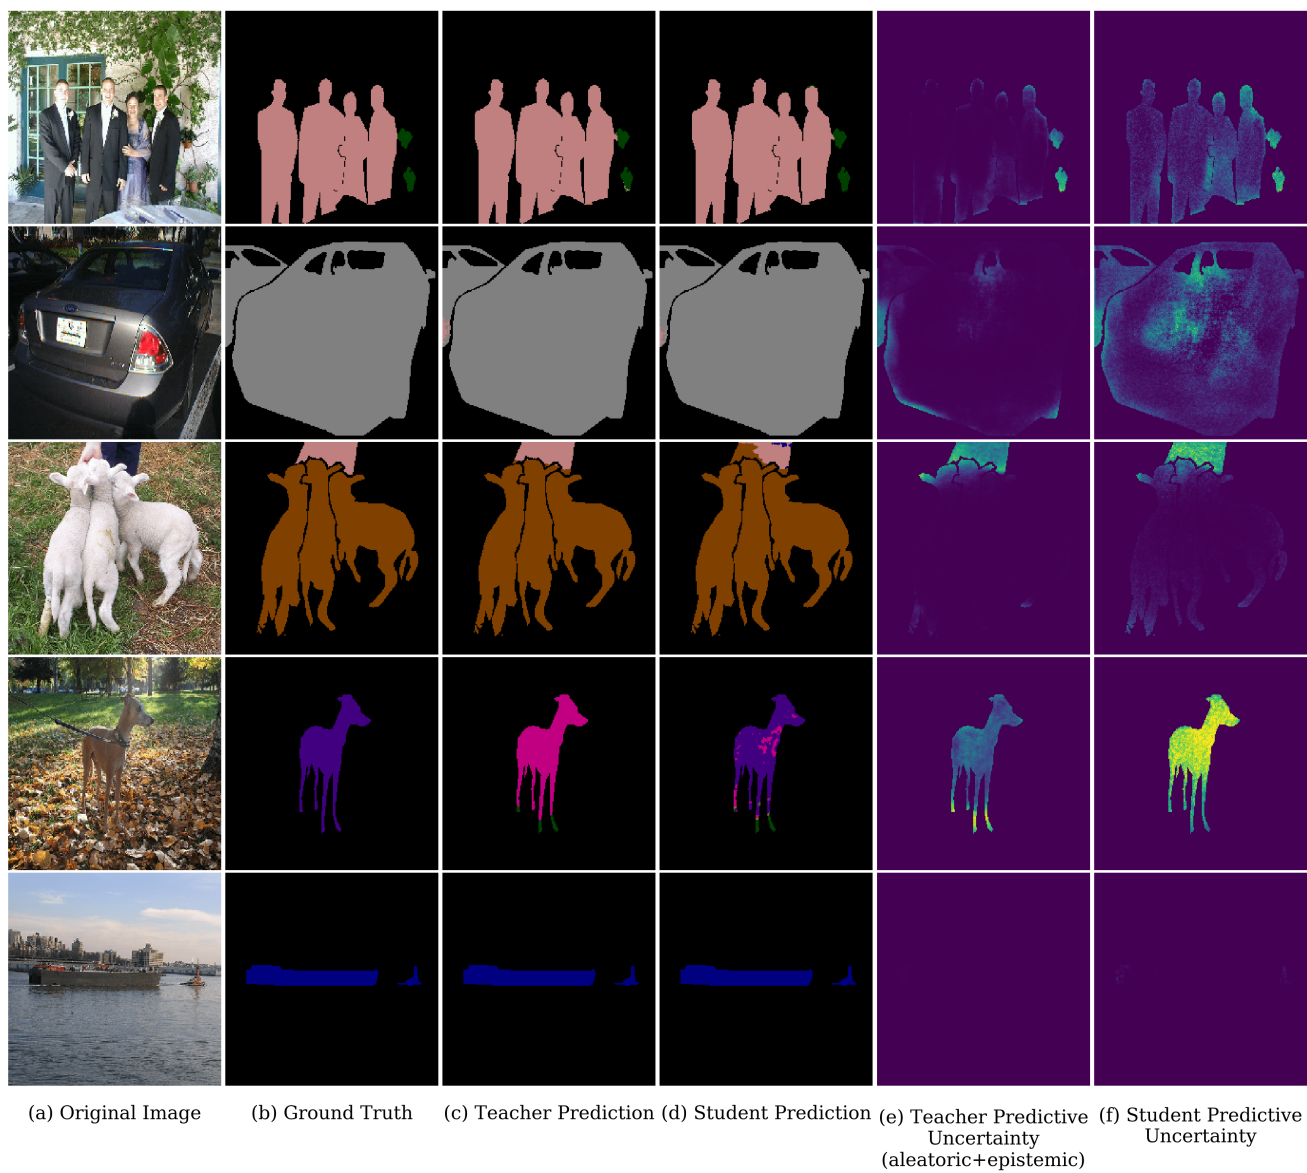

Figure 12: Additional example predictions on Pascal VOC2012.



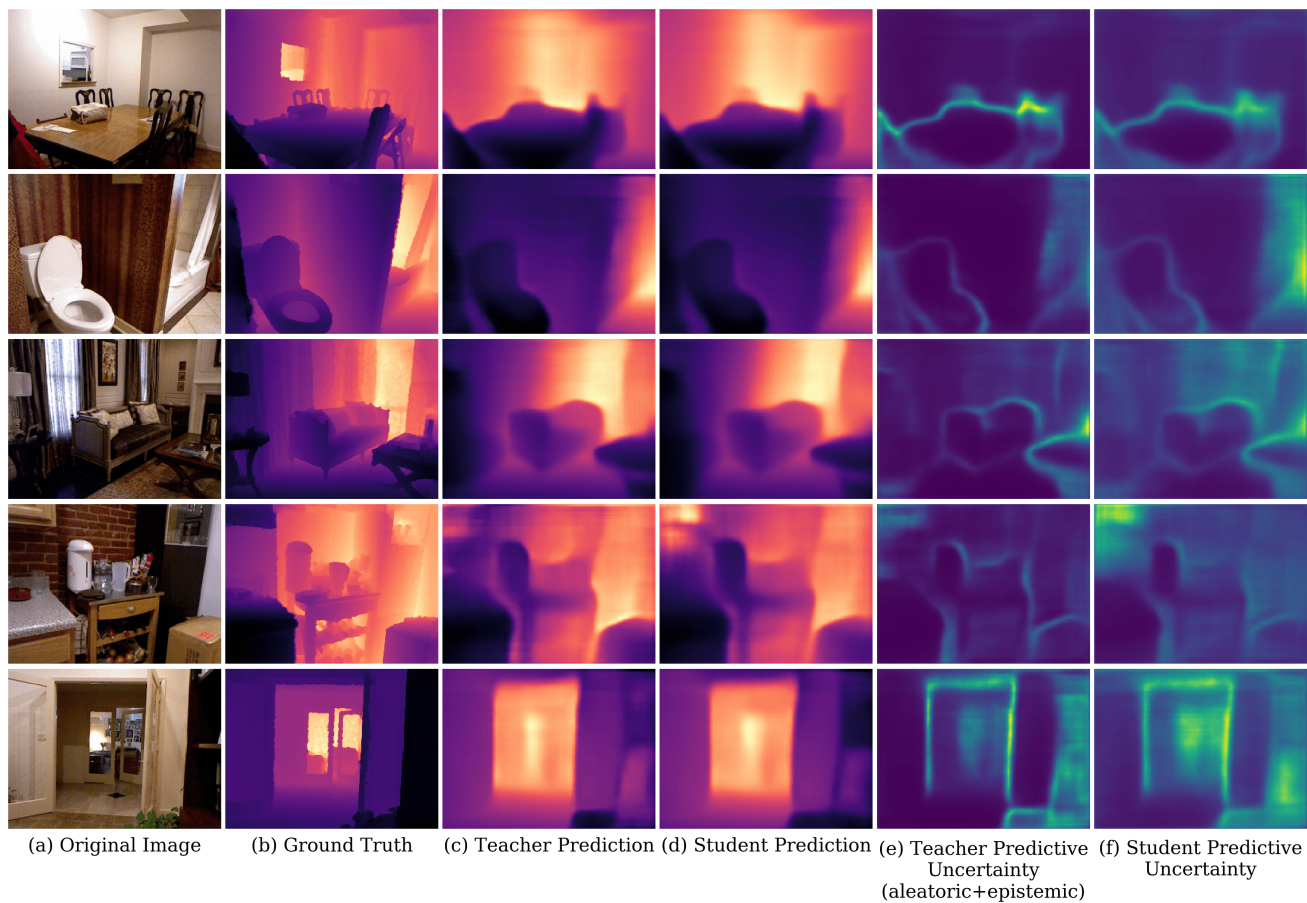

Figure 13: Additional example predictions on NYU.

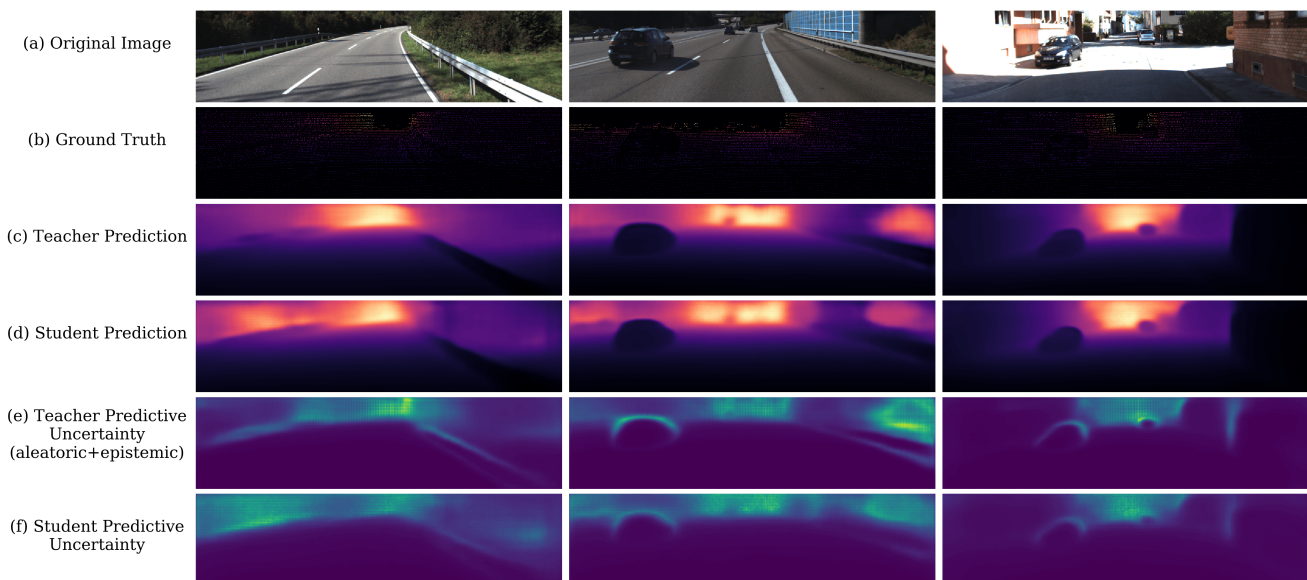

Figure 14: Example predictions on KITTI.



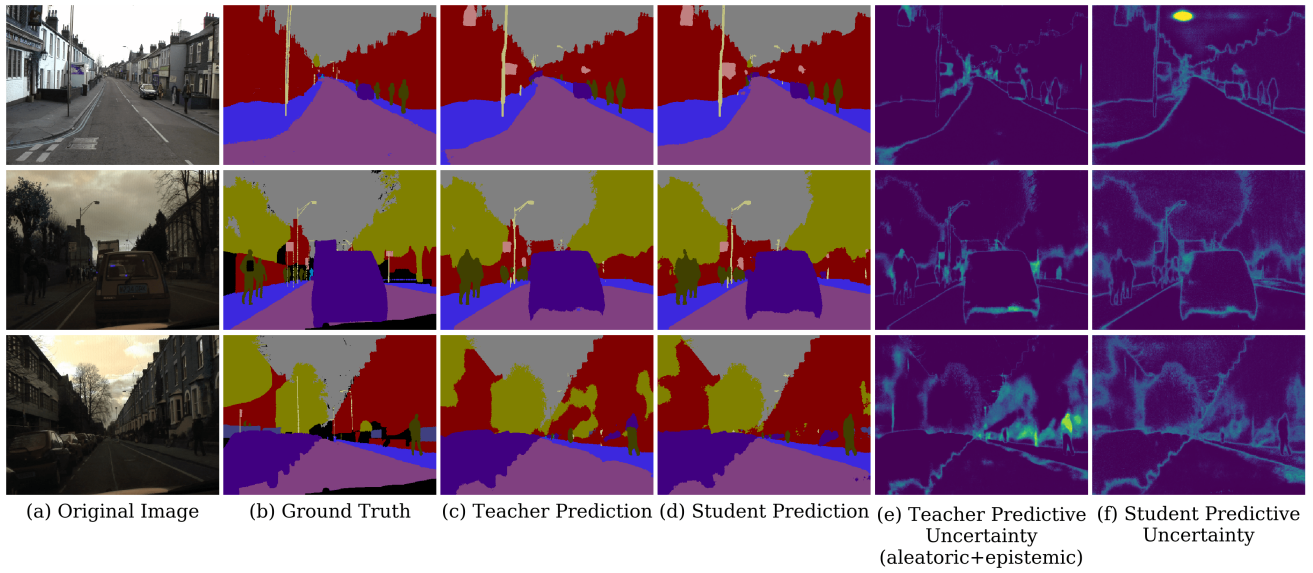

Figure 15: Example predictions on CamVid when using deep ensemble as the teacher model.

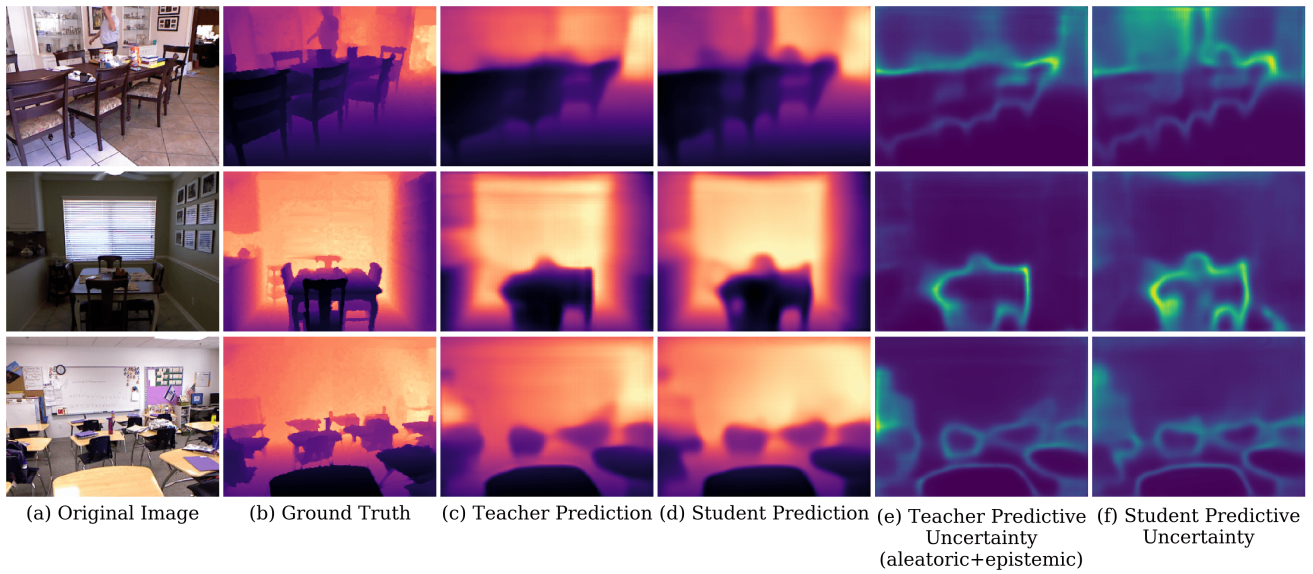

Figure 16: Example predictions on NYU when using deep ensemble as the teacher model.
